# Supplementary figures and images for: Monitoring of bacterial film formation and its breakdown with an angular-based surface plasmon resonance biosensor
Source: Royal Society of Chemistry journal article supplement (doi:10.1039/c7an00068e), 2017-01-01

# Cleaning agents on bare gold sensing surface

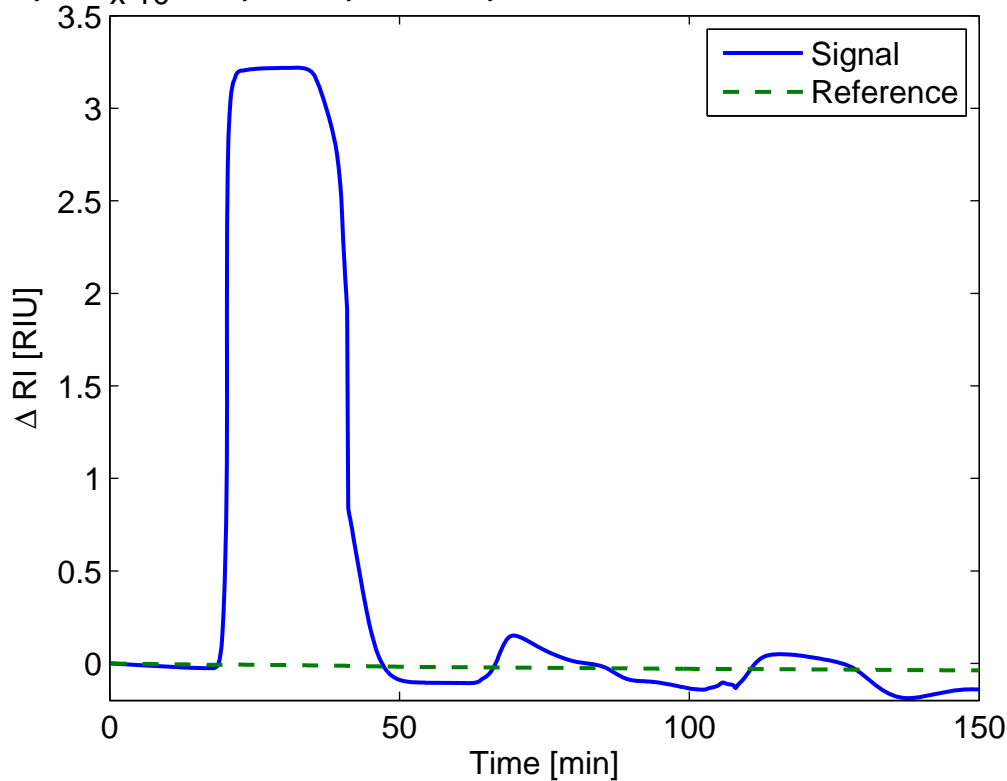

Supplement: c7an00068e2.pdf [file c7an00068e2.pdf]
